# Supplementary material for: Achillin Increases Chemosensitivity to Paclitaxel, Overcoming Resistance and Enhancing Apoptosis in Human Hepatocellular Carcinoma Cell Line Resistant to Paclitaxel (Hep3B/PTX)
Source: PubMed Central journal article supplement (PMC6835644; doi:10.3390/pharmaceutics11100512), 2019-10-04
Supplement: pharmaceutics-11-00512-s001.pdf [file pharmaceutics-11-00512-s001.pdf]

## Supplementary Materials: Achillin Increases Chemosensitivity to Paclitaxel, Overcoming Resistance and Enhancing Apoptosis in Human Hepatocellular Carcinoma Cell Line Resistant to Paclitaxel (Hep3B/PTX)

Jessica Nayelli Sanchez-Carranza, Leticia González-Maya, Rodrigo Said Razo-Hernández, Enrique Salas-Vidal, Ninfa Yaret Nolasco-Quintana, Aldo F. Clemente-Soto, Lucero García-Arizmendi, Mariana Sánchez-Ramos, Silvia Marquina and Laura Alvarez

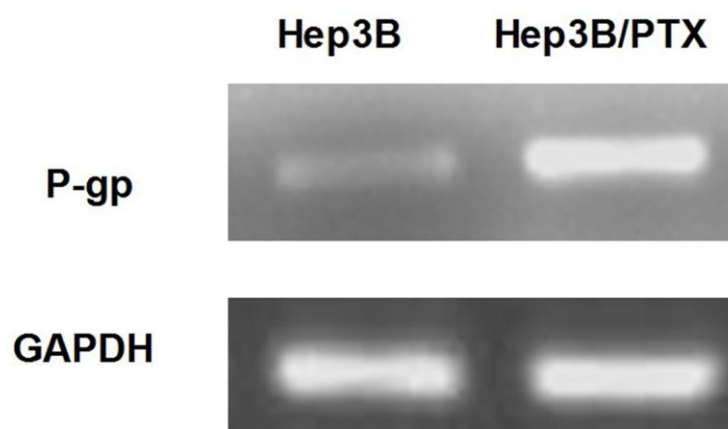

**Figure S1.** Analysis of mRNA levels of P-gp in Hep3B/PTX and Hep3B cells.

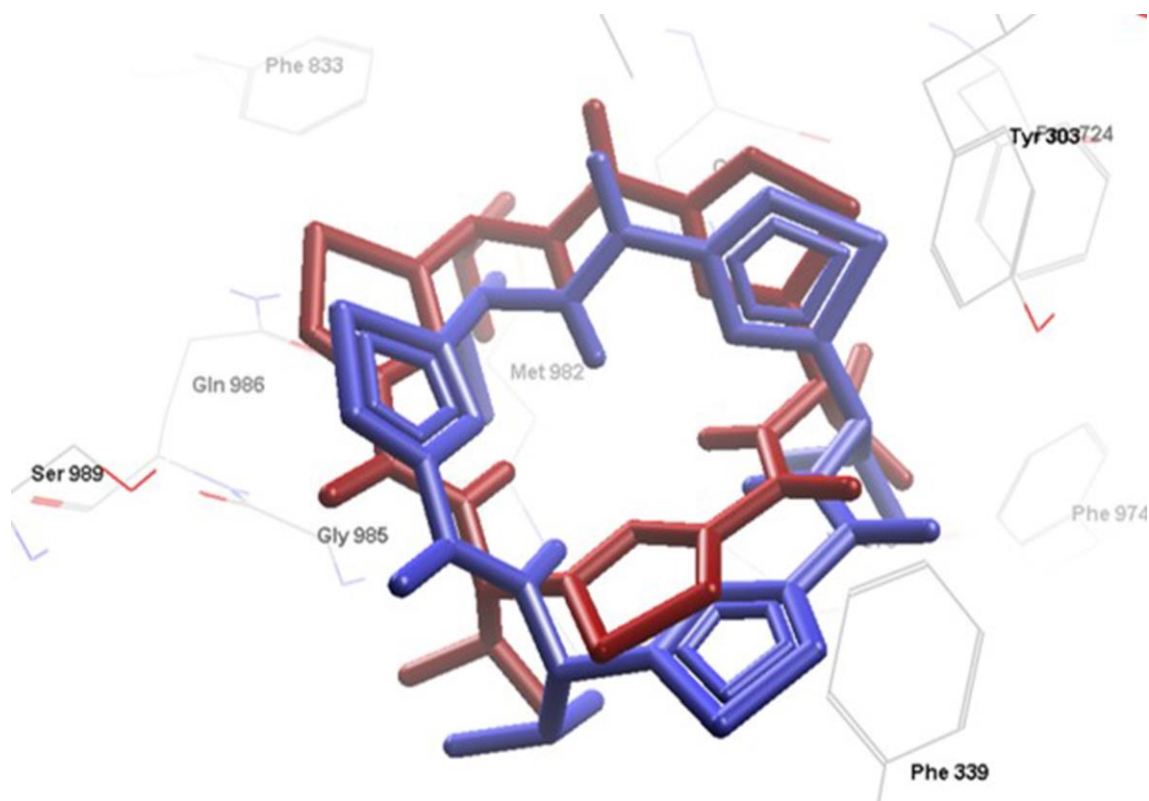

**Figure S2.** Structural validation of the docking calculations, using the crystal structure of mus musculus P-glycoprotein (PDB: 3G61).

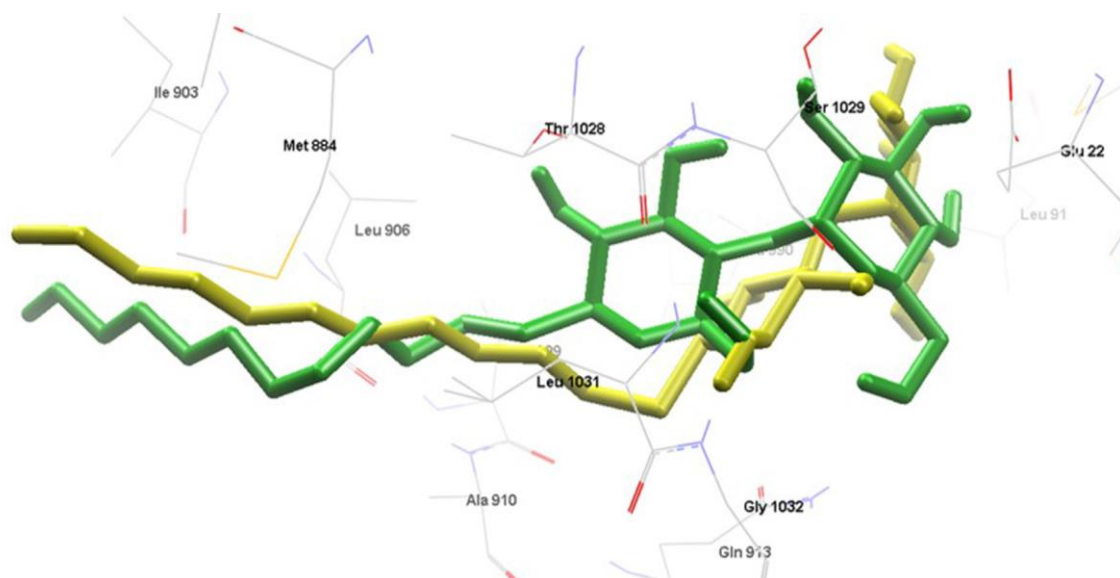

**Figure S3.** Structural validation of the docking calculations, using the crystal structure of Caenorhabditis elegans P-glycoprotein (PDB: 4F4C).

# Ramachandran Plot

## 3559815

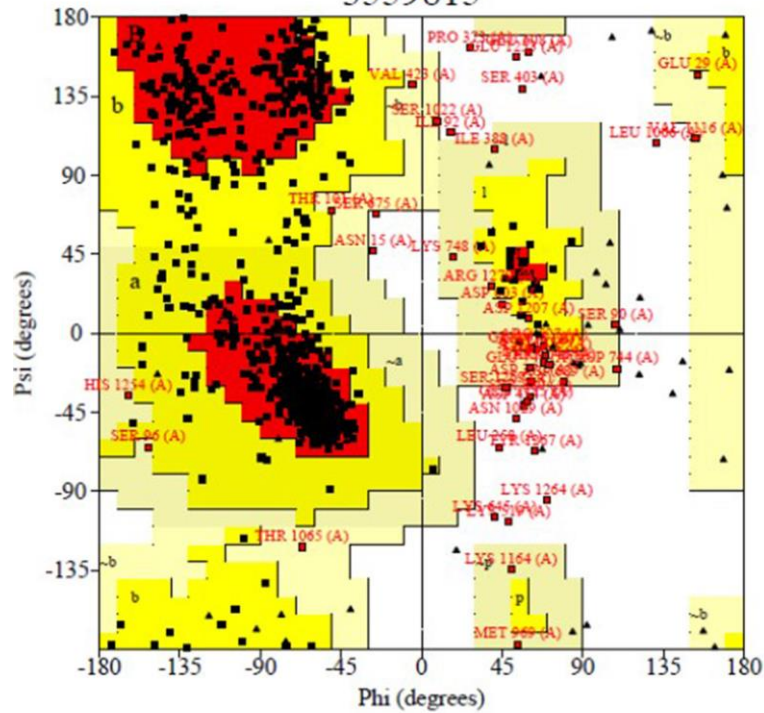

### Plot statistics

|                                                      |      |        |
|------------------------------------------------------|------|--------|
| Residues in most favoured regions [A.B.L]            | 970  | 84.3%  |
| Residues in additional allowed regions [a.b.l.p]     | 138  | 12.0%  |
| Residues in generously allowed regions [-a.-b.-l.-p] | 26   | 2.3%   |
| Residues in disallowed regions                       | 17   | 1.5%   |
| Number of non-glycine and non-proline residues       | 1151 | 100.0% |
| Number of end-residues (excl. Gly and Pro)           | 2    |        |
| Number of glycine residues (shown as triangles)      | 98   |        |
| Number of proline residues                           | 29   |        |
| Total number of residues                             | 1280 |        |

Figure S4. Ramachandran plot of mP-gp homology model.
